# Supplementary material for: A proteomic adaptation of small intestinal mucosa in response to dietary protein limitation
Source: PubMed Central journal article supplement (PMC5107940; doi:10.1038/srep36888), 2016-11-14
Supplement: srep36888-s1.pdf [file srep36888-s1.pdf]

## Supplementary file

### **A proteomic adaptation of small intestinal mucosa in response to dietary protein limitation**

Chunfu Qin<sup>1</sup>, Kai Qiu<sup>1</sup>, Wenjuan Sun<sup>1</sup>, Ning Jiao<sup>1</sup>, Xin Zhang<sup>1</sup>, Lianqiang Che<sup>2,\*</sup>,  
Haiyi Zhao<sup>3</sup>, Hexiao Shen<sup>3</sup> & Jingdong Yin<sup>1,\*</sup>

<sup>1</sup>State Key Lab of Animal Nutrition, College of Animal Science and Technology,  
China Agricultural University, Beijing, 100193, P. R. China

<sup>2</sup>Institute of Animal Nutrition, Sichuan Agricultural University, Ya'an, 625099, P. R.  
China

<sup>3</sup>Genecreate Biological Engineering Co., Ltd., National Bio-industry Base, Wuhan,  
430075, China

\* Correspondence should be addressed to J.Y. (email: yinjd@cau.edu.cn) or L.C.  
(email: clianqiang@hotmail.com)

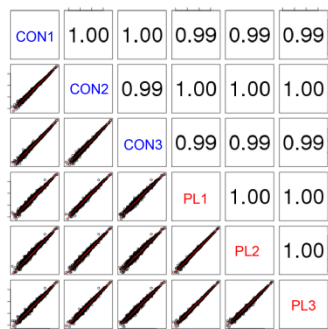

a

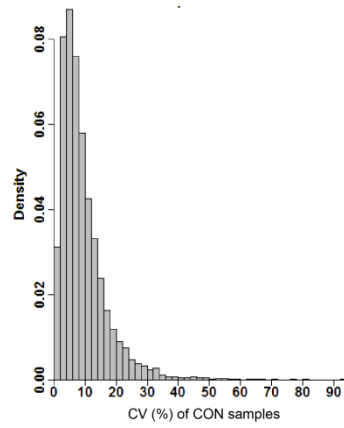

b

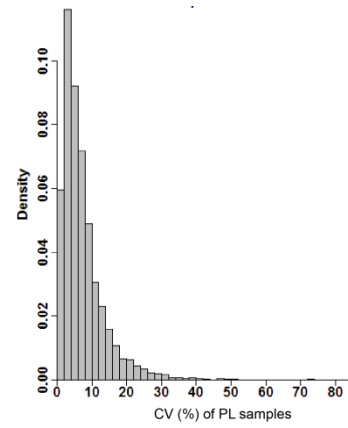

**Figure S1. Quality controls of iTRAQ analysis.** (a) All correlation coefficients of protein abundance between any of two replicates were above 0.99. (b) CV distributions in both groups were mainly distributed in range from 0 to 20%. This figure indicates high repeatability of the technical replicates. CON, control group. PL, dietary protein limitation. CV, coefficient of variation. n = 3.

| Ingredients             | CON   | PL    | Nutrient contents        | CON   | PL    |
|-------------------------|-------|-------|--------------------------|-------|-------|
| Corn                    | 67.48 | 67.44 | Net energy, Mcal/kg      | 2.44  | 2.44  |
| Soybean meal            | 10.56 | 2.49  | Crude protein            | 17.89 | 14.07 |
| Canola meal             | 2.17  | 0.51  | Crude fiber              | 3.48  | 3.48  |
| Cottonseed meal         | 2.17  | 0.51  | Lysine                   | 1.23  | 1.23  |
| Soy protein concentrate | 4.00  | 4.00  | Methionine               | 0.36  | 0.37  |
| Fish meal               | 3.00  | 3.00  | Methionine + Cysteine    | 0.68  | 0.69  |
| Rice bran               | 1.14  | 3.43  | Threonine                | 0.73  | 0.73  |
| Corn starch             | 4.24  | 12.28 | Tryptophan               | 0.20  | 0.20  |
| L-Lysine HCl            | 0.57  | 0.89  | Valine                   | 0.78  | 0.78  |
| DL-Methionine           | 0.24  | 0.37  | Isoleucine               | 0.63  | 0.63  |
| L-Threonine             | 0.22  | 0.37  | Leucine                  | 1.27  | 1.23  |
| L-Tryptophan            | 0.06  | 0.11  | Phenylalanine            | 0.75  | 0.73  |
| L-Valine                | 0.12  | 0.32  | Phenylalanine + Tyrosine | 1.20  | 1.15  |
| L-Isoleucine            | 0.06  | 0.25  | Histidine                | 0.43  | 0.42  |
| L-Leucine               |       | 0.27  | Arginine                 | 0.94  | 0.61  |
| L-Phenylalanine         |       | 0.31  | Calcium                  | 0.70  | 0.70  |
| L-Histidine HCl         |       | 0.13  | STTD phosphorus          | 0.33  | 0.33  |
| Soybean oil             | 1.20  | 0.40  |                          |       |       |
| Limestone               | 0.83  | 0.84  |                          |       |       |
| Dicalcium phosphate     | 0.54  | 0.68  |                          |       |       |
| Sodium chloride         | 0.30  | 0.30  |                          |       |       |
| Choline chloride, 50%   | 0.10  | 0.10  |                          |       |       |
| Vitamin-mineral premix  | 1.00  | 1.00  |                          |       |       |

**Table S1. Ingredients and nutrient contents of experimental diets (as-fed basis %).** CON, control group. PL, dietary protein limitation. Vitamin-mineral premix supplies the following (per kg of feed): vitamin A, 10 KIU; vitamin D<sub>3</sub>, 30 IU, vitamin E, 30 IU; vitamin K<sub>3</sub>, 6 mg; vitamin B<sub>1</sub>, 2 mg; vitamin B<sub>2</sub>, 6 mg; vitamin B<sub>6</sub>, 3 mg; vitamin B<sub>12</sub>, 20 µg; niacin, 40 mg; pantothenic acid, 24 mg; folic acid, 1.3 mg; biotin, 80 µg; Fe, 180 mg; Cu, 300 µg; Zn, 200 µg; Mn, 40 mg; I, 960 µg; Se, 720 µg. Amino acid contents are based on standardized ileal digestibility. STTD, standardized total tract digestible.

| Parameter             | Setting                                            |
|-----------------------|----------------------------------------------------|
| Type of search        | iTRAQ 8-plex (peptide labeled)                     |
| Enzyme                | Trypsin                                            |
| Cys Alkylation        | Iodoacetic acid                                    |
| Instrument            | TripleTOF 5600                                     |
| Bias Correction       | TRUE                                               |
| Background Correction | TRUE                                               |
| ID focus              | Biological modifications                           |
| Search Effort         | Thorough ID                                        |
| Protein Mass          | Unrestricted                                       |
| Database              | UniProt Pig (33958 entries, released October 2014) |

**Table S2. ProteinPilot parameter settings.**

| Antibody                       | Catalog no.   | Source | Clone | MW     | Dilution | Company    | Producing area     |
|--------------------------------|---------------|--------|-------|--------|----------|------------|--------------------|
| SGLT1/SLC5A1                   | bs-1128R      | Rabbit | Poly  | 73     | 1: 250   | BIOSS      | Beijing, China     |
| CLDN7                          | 34-9100       | Rabbit | Poly  | 22     | 1:1000   | Invitrogen | Carlsbad, CA, USA  |
| GPR108                         | sc-247056     | Goat   | Poly  | 61     | 1: 200   | Santa Cruz | Dallas, TX, USA    |
| SLC7A7                         | sc-34551      | Goat   | Poly  | 40     | 1: 200   | Santa Cruz | Dallas, TX, USA    |
| RNF40                          | bs-9170R      | Rabbit | Poly  | 110    | 1: 250   | BIOSS      | Beijing, China     |
| TRIM26                         | bs-16728R     | Rabbit | Poly  | 62     | 1: 250   | BIOSS      | Beijing, China     |
| 4F2hc/SCL3A2                   | bs-6659R      | Rabbit | Poly  | 69     | 1:500    | BIOSS      | Beijing, China     |
| ASCT2 /SLC1A5                  | ARP42247_T100 | Rabbit | Poly  | 60     | 1:500    | AVIVA      | San Diego, CA, USA |
| EAAT3/SLC1A1                   | SAB2102170    | Rabbit | Poly  | 57     | 1:1,000  | Sigma      | St. Louis, MO, USA |
| rBAT/SCL3A1                    | sc-32930      | Rabbit | Poly  | 83     | 1:500    | Santa Cruz | Dallas, TX, USA    |
| PepT1/SLC15A1                  | sc-19917      | Goat   | Poly  | 75     | 1:500    | Santa Cruz | Dallas, TX, USA    |
| mTOR                           | 2983          | Rabbit | Mono  | 289    | 1:1,000  | CST        | Danvers, MA, USA   |
| Phospho-mTOR (Ser2448)         | 5536          | Rabbit | Mono  | 289    | 1:500    | CST        | Danvers, MA, USA   |
| p70 S6 Kinase                  | 9202          | Rabbit | Poly  | 70, 85 | 1:1,000  | CST        | Danvers, MA, USA   |
| Phospho-p70 S6 kinase (Thr389) | 9205          | Rabbit | Poly  | 70, 85 | 1:500    | CST        | Danvers, MA, USA   |
| 4E-BP1                         | 9644          | Rabbit | Mono  | 15-20  | 1:1,000  | CST        | Danvers, MA, USA   |
| Phospho-4E-BP1 (Thr70)         | 13396         | Rabbit | Mono  | 15-20  | 1:500    | CST        | Danvers, MA, USA   |
| $\beta$ -actin                 | HX1827        | Mouse  | Mono  | 43     | 1:2,000  | HXBC       | Beijing, China     |

**Table S3. Information of primary antibodies used for western blotting analysis.** MW, molecular weight, kDa. BIOSS, Biosynthesis biotechnology; AVIVA, aviva systems biology; Sigma, sigma-aldrich corporation; Santa Cruz, Santa Cruz biotechnology; Invitrogen, invitrogen-thermo fisher scientific; CST, cell signaling technology; HXBC, huaxingbio science.
